# Supplementary material for: 无线的新概念——启亨GF4 Ti4200-8x无线VIVO显卡
Source: Hindawi journal article supplement (doi:10.1155/2015/497253), 2003-01-01
Supplement: f1 [file 497253.f1.pdf]

## Supplementary file

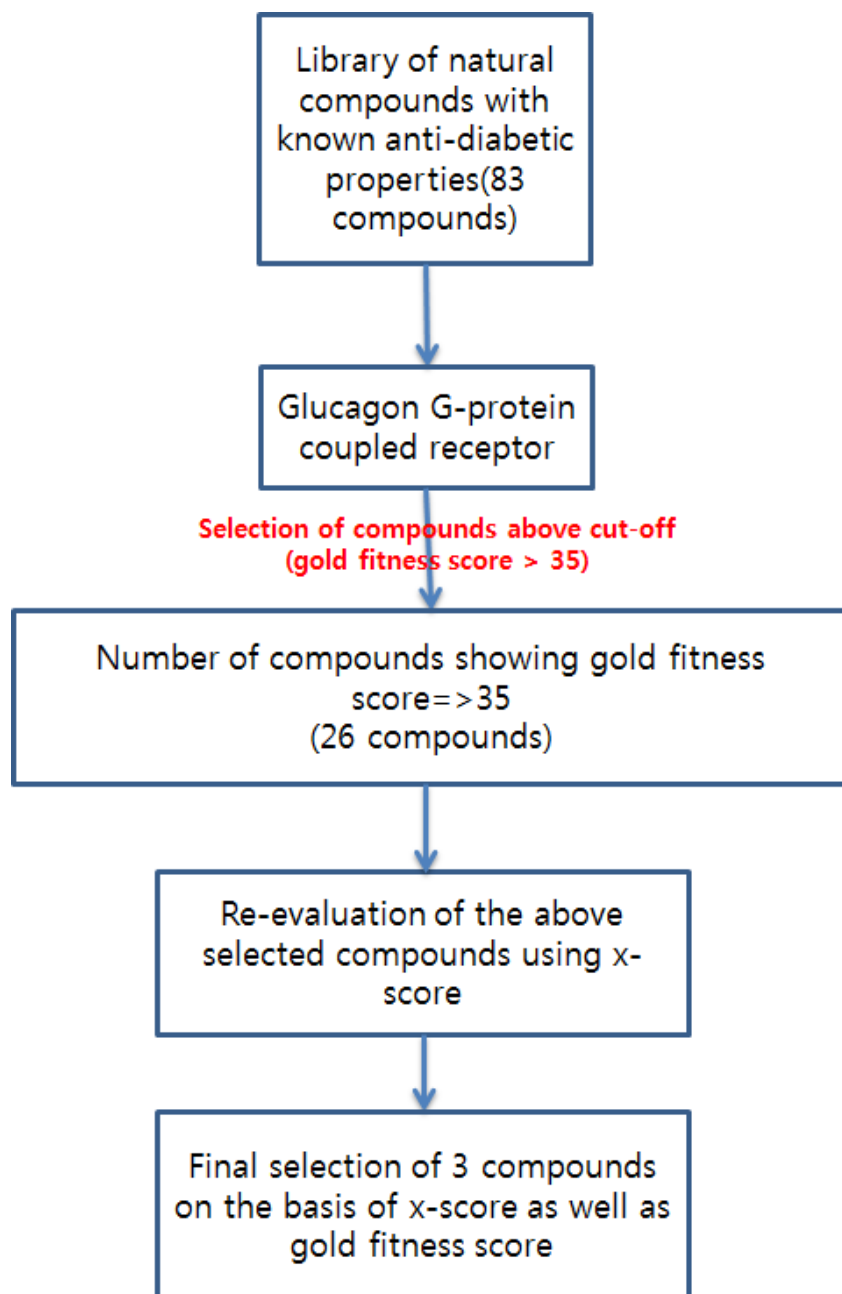

**Workflow for *in silico* protocol used in this study**
